# Supplementary material
Source: publisher site journal article supplement (https://www.dovepress.com/article/537212)
Supplement: Supplementary file 1 [file SUPPLEMENTARY.docx]

**Supplementary**

In the figure S1, each numbered item corresponds to a key clinical feature or diagnostic clue within the image. These numbered items are systematically listed in the accompanying table below the figure, which provides a concise description and explains the clinical significance of each element. This integrated format is designed to help pre-medical students actively engage with image-based diagnostic interpretation by linking visual observations to underlying clinical reasoning and pathophysiology.

**Figure S1** A CONFUSED PATIENT - **Example for image-based interpretation exercises for pre-med students. Question – observe and identify the numbered items and interpret the observations.**

**
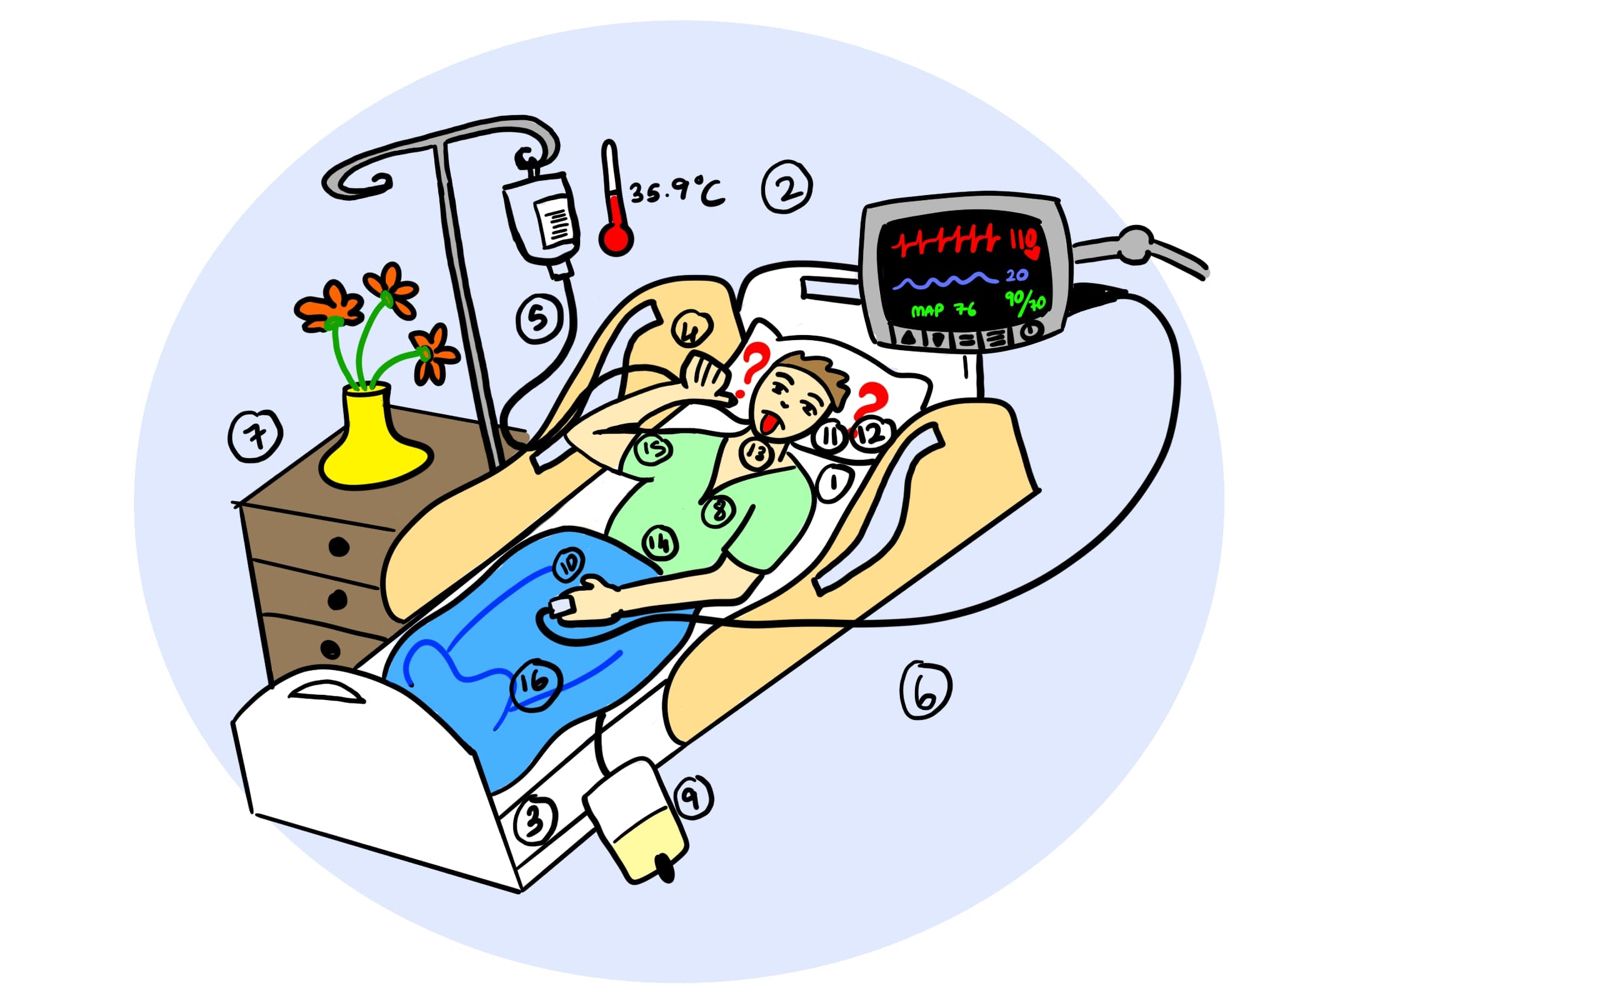
**

|  | Observations | Interpretations |
| --- | --- | --- |
| 1 | Patient  Face grimacing  Patient seems to be confused  Slurred speech  Moving all 4 limbs  Staring blankly into space, eyes turned left, looking upwards, staring blankly  Gesturing that he wants to drink water | Confusion (alcohol withdrawal?)  Cerebellar involvement?  No paralysis  Possible hallucinations  Thirsty |
| 2 | Connected to a monitor  Pulse  BP  Respiratory rate | Requires supervised treatment |
|  | Temperature | 37.4 |
|  | Oxygen saturation | 95% |
|  | Heart rate – 110/min | Tachycardia |
|  | BP – 80/50 mmHg | Hypotension |
|  | MAP 60 | Reduced tissue perfusion |
|  | RR – 18/min | Normal |
| 3 | Air bed | Prevention of DVT |
| 4 | Iv line | Need for IV fluids |
| 5 | No oxygen | No hypoxia – CHF, Pneumonia, exacerbation of asthma, COPD unlikely |
| 6 | No bystanders | affect communication, consent, decision-making, and emotional support for the patient. |
| 7 | No food or water on food tray + No NG tube | Intentional prevention of water intake – Possibly planning a surgical procedure |
| 8 | ECG not connected | No arrhythmia (A fib) |
| 9 | Urine catheter 30 ml in bag | Not in a position to go to the washroom; Need for accurate urine output assessment |
| 10 | Refill time on finger – 4 seconds – Increased | Reduced tissue perfusion |
| 11 | Eyes | Half open, confused |
| 12 | Tongue  No facial asymmetry, No ophthalmoplegia, No nystagmus, Tongue movements normal | Cranial nerves may be normal |
| 13 | Neck - Carotid pulsations and subclavian artery pulsations – normal | No blocks = Not likely ischemia of limbs or brain |
| 14 | Chest and abdomen - Bilaterally symmetrical chest movement; No adventitious sounds | Not likely lobar fibrosis, pleural effusion, pneumothorax, consolidation, tumor, asthma, COPD |
| 15 | Upper limb | Left arm with IV line  Right making sign for drinking water |
| 16 | Lower limb  Left ankle joint - Warmth, tenderness, painful limitation of movements, yellow spot | Ankle swelling  Pus,  Septic arthritis left ankle |
